# Supplementary material for: Aggregation-induced emission enhancement and living cell imaging of novel diarylanthracene conjugated dyes
Source: Royal Society of Chemistry journal article supplement (doi:10.1039/c5nj01672j), 2015-10-21
Supplement: c5nj01672j1.pdf [file c5nj01672j1.pdf]

*Electronic Supplementary Information (ESI)*

**Aggregation-induced emission enhancement and living cell imaging of novel diarylanthracene conjugated dyes**

Chao Xia, Ying Qian\*

**1, Characterization of CzAn and BCzAn**

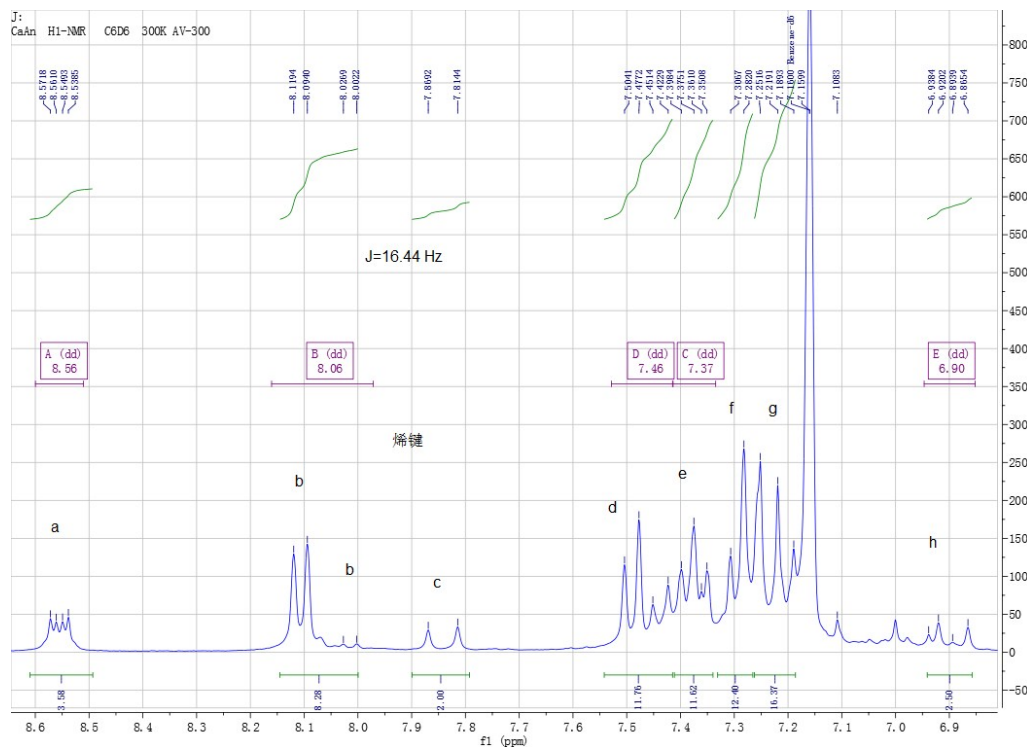

**Fig. S1**  $^1\text{H}$  NMR spectra of CzAn in  $\text{C}_6\text{D}_6$

CaAn C13-NMR C6D6 300k AV-300

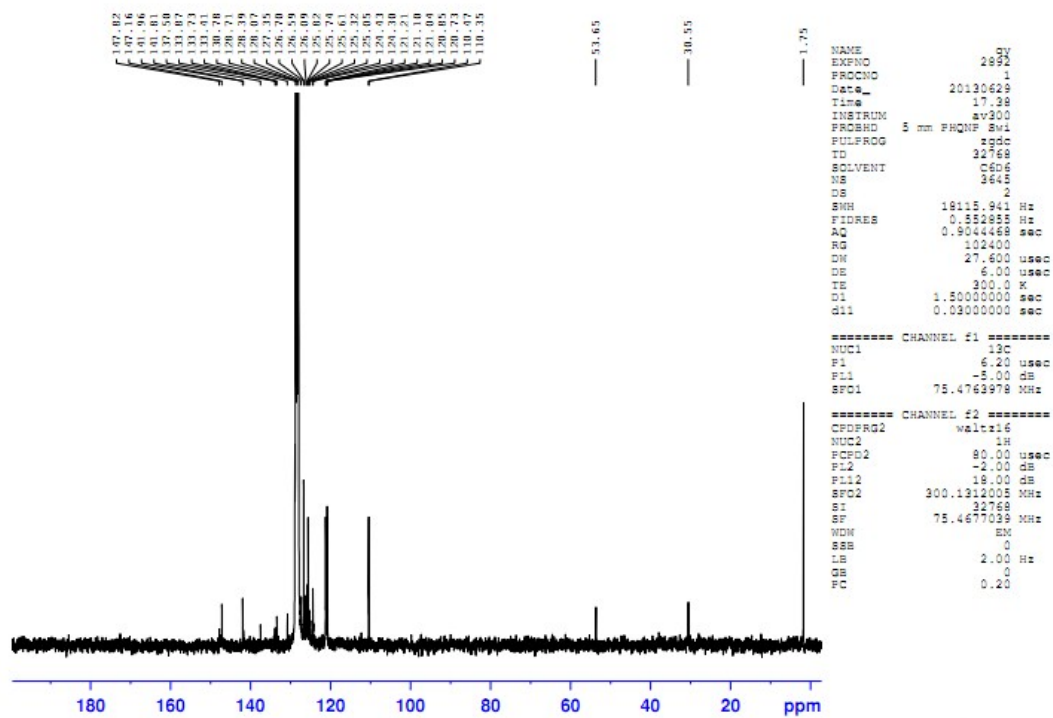

Fig. S2  $^{13}\text{C}$  NMR spectra of CzAn in  $\text{C}_6\text{D}_6$

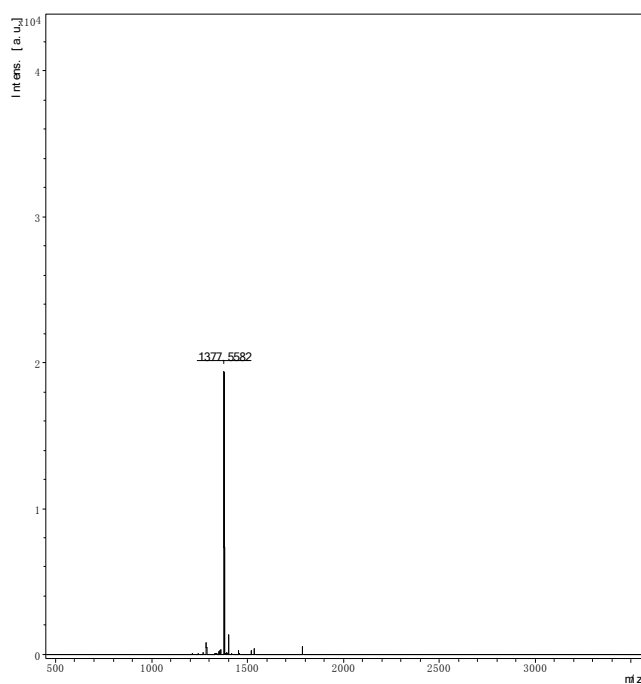

Fig. S3 HRMS-MALDI-TOF of CzAn



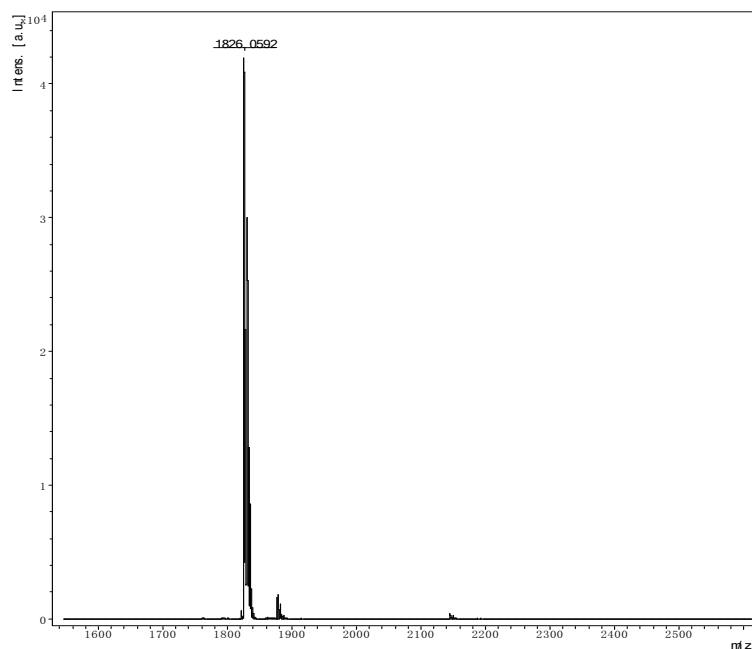

Fig. S6 HRMS-MALDI-TOF of BCzAn

## 2, Fluorescence spectra of CzAn in THF-water mixtures

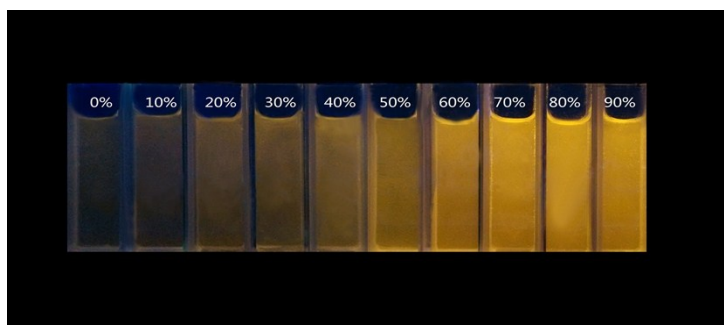

Fig. S7 Optical photographs recorded under 365 nm UV irradiation for and CzAn in THF-H<sub>2</sub>O mixtures with various volume fractions of water

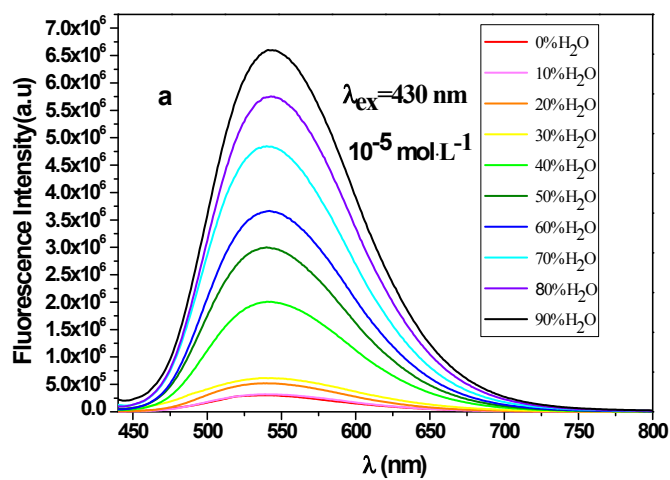

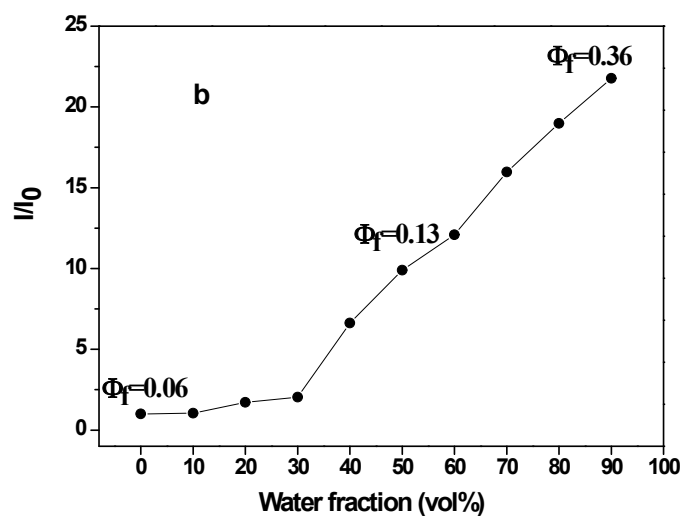

**Fig. S8** Fluorescence spectra of CzAn ( $10^{-5} \text{ mol}\cdot\text{L}^{-1}$ ) in THF with different water fractions excited at 425nm (a); fluorescence peak intensities of BCzAn in THF ( $10^{-5} \text{ mol}\cdot\text{L}^{-1}$ ) with different water fractions ( $I/I_0$ ,  $I_0$ = fluorescence intensity in pure THF solution,  $\lambda_{\text{ex}}=430 \text{ nm}$ ,  $\Phi_f$  represents fluorescence quantum yield) (b)

### 3, UV-vis absorbance spectra of BCzAn in THF-water mixtures

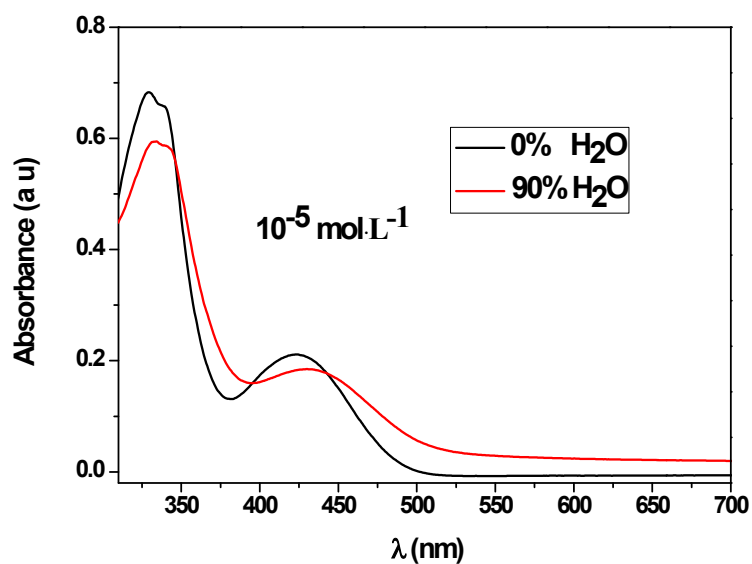

**Fig. S9** UV-vis absorbance spectra of CzAn in THF ( $10^{-5} \text{ mol}\cdot\text{L}^{-1}$ ) with different water fractions

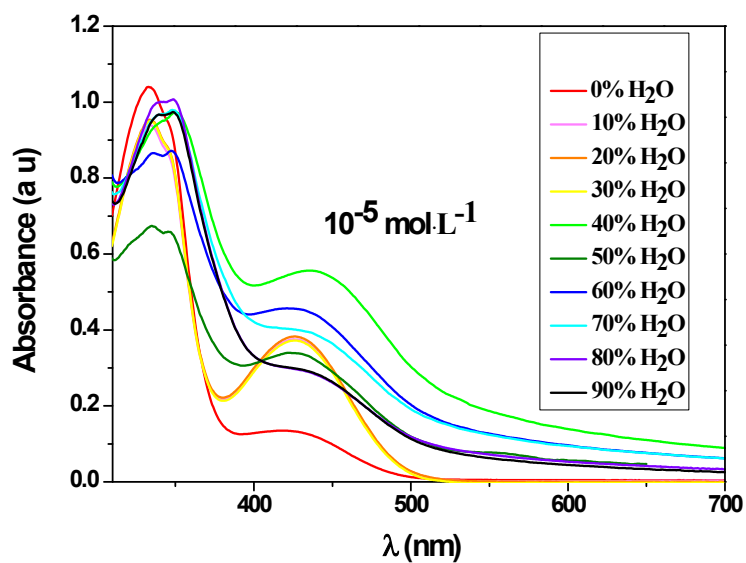

Fig. S10 UV-vis absorbance spectra of BCzAn in THF ( $10^{-5} \text{ mol}\cdot\text{L}^{-1}$ ) with different water fractions

#### 4, Fluorescence spectra of CzAn in DMF-glycerol mixtures

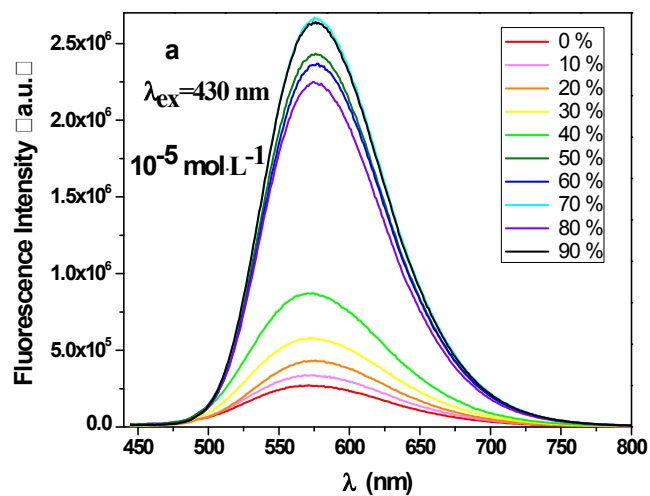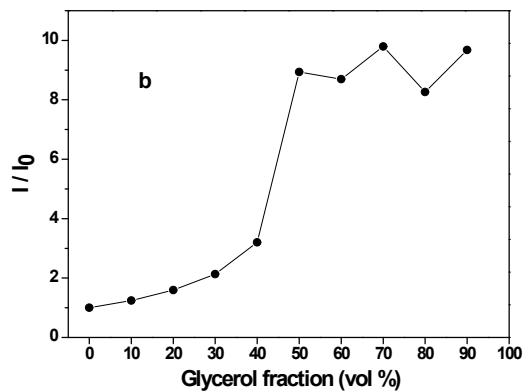

**Fig. S11** Fluorescence spectra of CzAn at  $10^{-5} \text{ mol}\cdot\text{L}^{-1}$  in DMF with different glycerol fractions ( $\lambda_{\text{ex}}=430 \text{ nm}$ ) (a); fluorescence peak intensities of BCzAn in DMF ( $10^{-5} \text{ mol}\cdot\text{L}^{-1}$ ) with different glycerol fractions ( $I/I_0$ ,  $I_0$ = fluorescence intensity in pure DMF solution,  $\lambda_{\text{ex}}=425 \text{ nm}$ ) (b).

### 5, Fluorescence, UV-vis absorption spectra of CzAn and BCzAn in different organic solvents

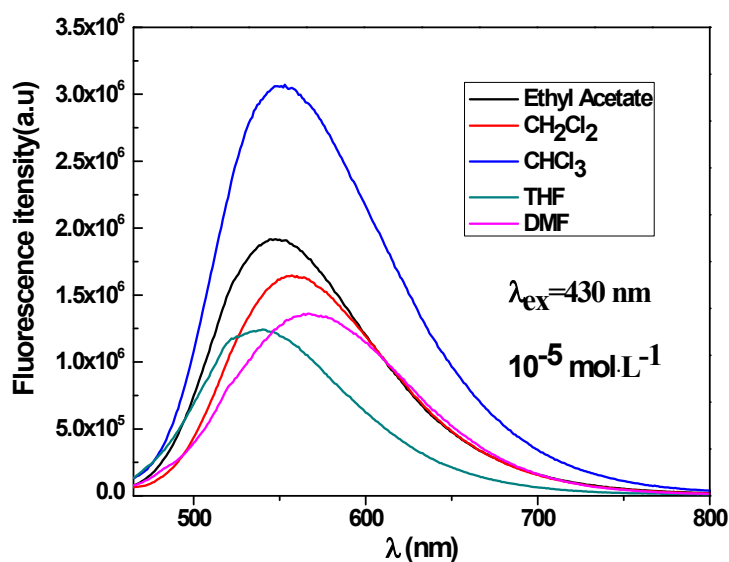

**Fig. S12** Fluorescence spectra of CzAn ( $10^{-5} \text{ mol}\cdot\text{L}^{-1}$ ) in different organic solvents excited at 430nm

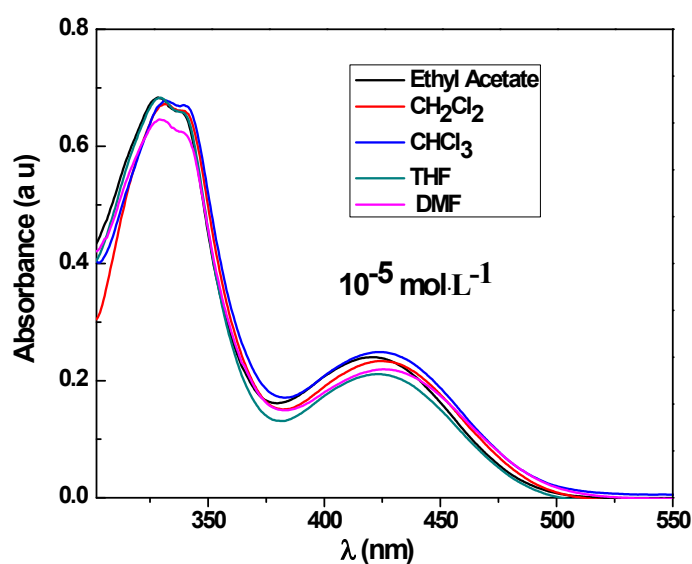

**Fig. S13** UV-vis absorption spectra of CzAn ( $10^{-5} \text{ mol}\cdot\text{L}^{-1}$ ) in different organic solvents

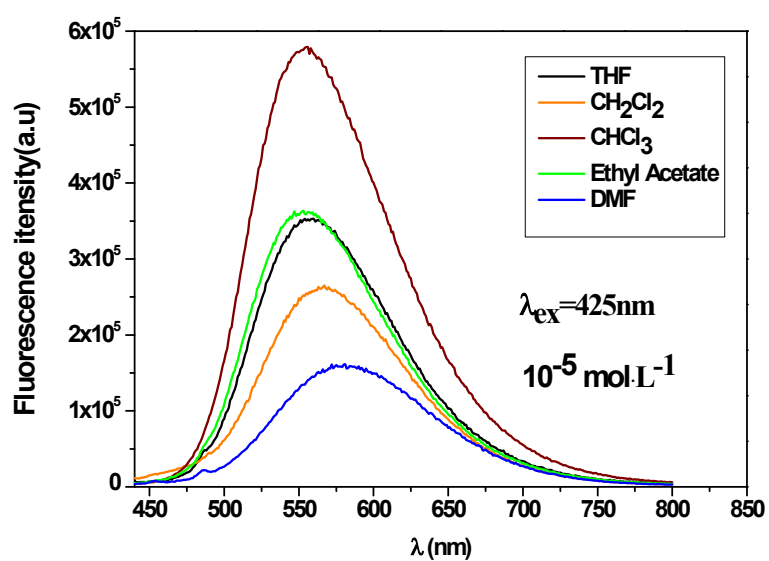

**Fig. S14** Fluorescence spectra of BCzAn ( $10^{-5} \text{ mol}\cdot\text{L}^{-1}$ ) in different organic solvents excited at 425nm

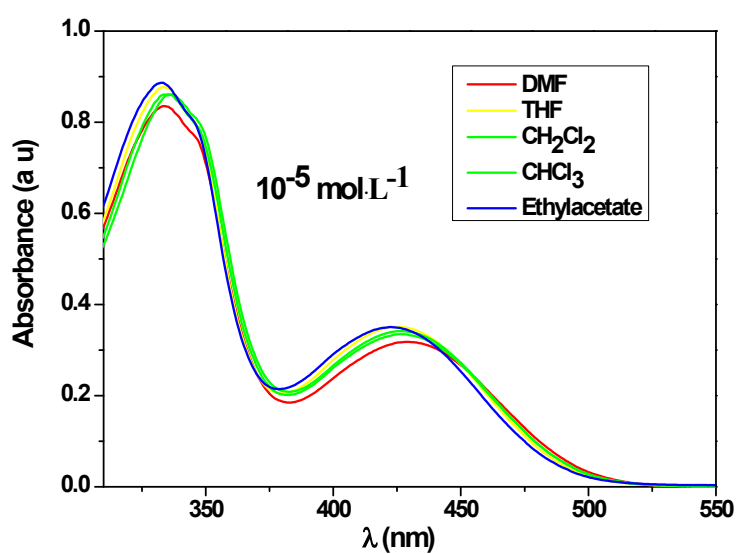

**Fig. S15** UV-vis absorption spectra of BCzAn ( $10^{-5} \text{ mol}\cdot\text{L}^{-1}$ ) in different organic solvents
